# Supplementary material for: ERR1- and PGC1α-associated mitochondrial alterations correlate with pan-cancer disparity in African Americans
Source: JCI journal article supplement (doi:10.1172/jci127579), 2019-03-28
Supplement: sd1 [file 1]

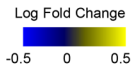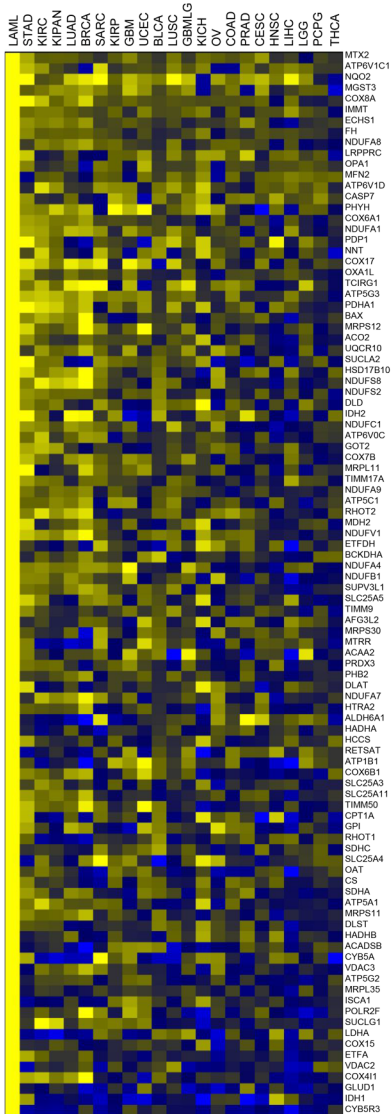

Supplementary Figure 1. Heat Map showing the top 50 % of the genes that contributed to the Normalized Enrichment Score (NES, refer Figure 1A) for the OXPHOS GSEA concept in each tumor type. The GSEA analysis summarizes the Enrichment with Normalized enrichment score (NES) statistics. In addition, it also ranks the genes that contributed to the Normalized enrichment score. Here, an average rank per gene was calculated for each of the 23 cancer types and the genes were ordered based on their average rank. Following this, the heat map was generated using the top 50 % of the average ranked genes in the OXPHOS pathway. The tumors in this heat map are arranged in columns. Rows represent the genes. Genes are arranged in the decreasing order of their expression across all the tumors. Shades of yellow and blue represent up and down regulated genes respectively (refer to color scale). Genes are arranged in the decreasing order of expression within each tumor type. LAML: Acute myeloid leukemia, STAD: Stomach adenocarcinoma, SARC: Sarcoma, HNSC: Head and neck squamous cell carcinoma, KIRC: Kidney renal clear cell carcinoma, LUSC: Lung squamous cell carcinoma, LUAD: Lung adenocarcinoma, LIHC: Live hepatocellular carcinoma, KIRP: Kidney renal papillary cell carcinoma, PRAD: Prostate adenocarcinoma, KICH: Kidney chromophobe, CESC: Cervical squamous cell carcinoma and endocervical adenocarcinoma, GBM: Glioblastoma multiforme, BLCA: Bladder cancer, KIPAN: Pan-kidney cohort, COAD: Colon adenocarcinoma, OV: Ovarian adenocarcinoma, BRCA: Breast cancer, LGG: Brain low grade glioma, GBMLGG: Glioblastoma multiforme low grade glioma, UCEC: Uterine corpus endometrial carcinoma, PCPG: Pheochromocytoma and paraganglioma, and THCA: Thyroid carcinoma.

**Supplementary Table 1: Five and ten year survival rates for different cancer types (SEER database)**

| Cancer site            | African-Americans |                  | European-Americans |                  |
|------------------------|-------------------|------------------|--------------------|------------------|
|                        | % survival (5y)   | % survival (10y) | % survival (5y)    | % survival (10y) |
| Bladder                | 63.6              | 55.5             | 77.9               | 70.4             |
| Breast                 | 79.6              | 70.8             | 90.4               | 84.7             |
| Cervix                 | 58.1              | 53.2             | 69.5               | 64.4             |
| Colon                  | 56.1              | 49.8             | 64.5               | 58.2             |
| Brain                  | 39.3              | 33.4             | 32.5               | 27.3             |
| Head and neck          | 44.7              | 35.7             | 64.4               | 54.5             |
| Kidney                 | 71.1              | 63.1             | 72                 | 64.3             |
| Acute myeloid leukemia | 26.1              | 23.8             | 24                 | 21.5             |
| Liver                  | 12.5              | 7.5              | 15.8               | 11.2             |
| Lung                   | 14.4              | 9.2              | 17.2               | 11.4             |
| Ovary                  | 37.2              | 29               | 45.5               | 35.4             |
| Prostate               | 96.2              | 93               | 98.8               | 98.2             |
| Sarcoma                | 56                | 47               | 73.8               | 67.9             |
| Stomach                | 28.2              | 23.3             | 26.9               | 22.4             |
| Thyroid                | 96.3              | 95.1             | 97.9               | 97.5             |
| Uterus                 | 61.2              | 55.5             | 83.6               | 80.7             |

SEER- Surveillance Epidemiology and End Results.

- Survival rates that are lower in African Americans compared to European Americans are highlighted in red.
- Survival data indicates that African Americans perform poorly when compared to European Americans for most cancer types.
- Although the expected trend is not observed in acute myeloid leukemia, stomach cancer, and cancers of the brain, there is evidence in literature to show that racial disparity exists for these cancer types as well (1-5).

#### REFERENCES

1. Patel MI, Ma Y, Mitchell B, and Rhoads KF. How do differences in treatment impact racial and ethnic disparities in acute myeloid leukemia? *Cancer epidemiology, biomarkers & prevention : a publication of the American Association for Cancer Research, cosponsored by the American Society of Preventive Oncology*. 2015;24(2):344-9.
2. Patel MI, Ma Y, Mitchell BS, and Rhoads KF. Understanding disparities in leukemia: a national study. *Cancer causes & control : CCC*. 2012;23(11):1831-7.
3. Jinjuvadia R, Jinjuvadia K, and Liangpunsakul S. Racial disparities in gastrointestinal cancers-related mortality in the U.S. population. *Digestive diseases and sciences*. 2013;58(1):236-43.
4. Claus EB, and Black PM. Survival rates and patterns of care for patients diagnosed with supratentorial low-grade gliomas: data from the SEER program, 1973-2001. *Cancer*. 2006;106(6):1358-63.
5. McCarthy BJ, Davis FG, Freels S, Surawicz TS, Damek DM, Grutsch J, Menck HR, and Laws ER, Jr. Factors associated with survival in patients with meningioma. *Journal of neurosurgery*. 1998;88(5):831-9.

**Supplementary Table 3- Normalized enrichment scores for GSEA performed on five independent validation datasets**

|                                 | BRCA     | PRAD     | PRAD    | LUAD      | COAD     |
|---------------------------------|----------|----------|---------|-----------|----------|
|                                 | GSE37751 | GSE64331 | GSE6956 | GSE101929 | GSE28000 |
| Pathway                         |          |          |         |           |          |
| OXIDATIVE_PHOSPHORYLATION       | 1.32     | 6.98     | 4.3     | 1.46      | -2.07    |
| DNA_REPAIR                      | 1.67     | 4.87     | 1.65    | 2.42      | -2.03    |
| G2M_CHECKPOINT                  | 1.5      | 1.79     | 1.85    | -2.24     | -3.63    |
| MTORC1_SIGNALING                | 1.43     | 5.07     | 1.51    | 1.68      | -2.24    |
| E2F_TARGETS                     | 1.52     | 2.03     | 2.71    | -1.78     | -4.52    |
| MITOTIC_SPINDLE                 | 1.56     | 3.21     | -1.58   | -2.8      | -2.61    |
| MYC_TARGETS_V1                  | 1.62     | 7.64     | -2.59   | 2.04      | -4.62    |
| PROTEIN_SECRETION               | NS       | 5.32     | -2.34   | -1.24     | -2.07    |
| MYC_TARGETS_V2                  | 1.59     | 3.23     | 2.01    | 2.39      | NS       |
| UNFOLDED_PROTEIN_RESPONSE       | 1.57     | 5.37     | 1.66    | 2.2       | -1.85    |
| P53_PATHWAY                     | NS       | 3.39     | 1.87    | -2.57     | 1.52     |
| ADIPOGENESIS                    | NS       | 5.09     | 1.35    | 1.7       | NS       |
| PI3K_AKT_MTOR_SIGNALING         | NS       | 4.25     | NS      | 1.63      | -1.57    |
| REACTIVE_OXYGEN_SPECIES_PATHWAY | NS       | 2.7      | 2.45    | 1.62      | NS       |
| FATTY_ACID_METABOLISM           | NS       | 3.61     | NS      | -3.38     | NS       |
| HEME_METABOLISM                 | NS       | 2.76     | -1.39   | -2.42     | NS       |
| CHOLESTEROL_HOMEOSTASIS         | NS       | 2.67     | -1.94   | 1.39      | NS       |
| UV_RESPONSE_DN                  | NS       | 2.81     | NS      | -3.56     | -2.03    |
| IL2_STAT5_SIGNALING             | NS       | 3.5      | 3       | -2.35     | 2.06     |
| TNFA_SIGNALING_VIA_NFKB         | NS       | 3.08     | 4.88    | 3.05      | 3.51     |

Cutoff for enrichment-  $P < 0.01$ , FDR <25%

**Validate\_GSEA\_NES**

**Supplementary Table 6- P values for ERR1 and PGC1 $\alpha$  enrichment across 23 cancer types**

| <b>Cohort</b> | <b>P-value PGC1</b> | <b>p-value ERR1</b> | <b>significance(-log10(p-value)_PGC1</b> | <b>significance(-log10(p-value)_ERR1</b> |
|---------------|---------------------|---------------------|------------------------------------------|------------------------------------------|
| <b>CESC</b>   | 1.22158E-05         | 9.71018E-39         | 4.913077666                              | 38.0127725                               |
| <b>GBM</b>    | 3.58509E-05         | 1.67078E-32         | 4.445500221                              | 31.77707994                              |
| <b>GBMLGG</b> | 0.00000753          | 3.60237E-34         | 5.123205024                              | 33.4434119                               |
| <b>KICH</b>   | 1.26973E-05         | 1.41416E-43         | 4.896288668                              | 42.84950289                              |
| <b>KIPAN</b>  | 0.000456531         | 5.72679E-37         | 3.340530195                              | 36.24208896                              |
| <b>LAML</b>   | 1.04406E-05         | 5.07233E-38         | 4.98127632                               | 37.29479247                              |
| <b>LGG</b>    | 1.37083E-05         | 3.66251E-37         | 4.86301559                               | 36.43622164                              |
| <b>LIHC</b>   | 9.3206E-05          | 3.18185E-40         | 4.03055634                               | 39.49731981                              |
| <b>PCPG</b>   | 0.000354548         | 4.96741E-38         | 3.450324691                              | 37.30386996                              |
| <b>PRAD</b>   | 1.26973E-05         | 2.56251E-42         | 4.896288668                              | 41.59133442                              |
| <b>STAD</b>   | 9.2565E-06          | 5.07233E-38         | 5.033552967                              | 37.29479247                              |
| <b>SARC</b>   | 0.0000871           | 6.91563E-41         | 4.059981845                              | 40.16016838                              |
| <b>UCEC</b>   | 8.1309E-05          | 1.46601E-44         | 4.089861607                              | 43.83386419                              |
| <b>THCA</b>   | 8.416E-05           | 3.79482E-38         | 4.074894183                              | 37.42080887                              |
| <b>OV</b>     | 1.31947E-05         | 6.10262E-41         | 4.879601676                              | 40.21448389                              |
| <b>LUSC</b>   | 1.12988E-05         | 5.42979E-39         | 4.946966162                              | 38.26521731                              |
| <b>LUAD</b>   | 7.32246E-05         | 1.99812E-42         | 4.135343287                              | 41.69937843                              |
| <b>KIRP</b>   | 4.71499E-05         | 2.72747E-40         | 4.326518999                              | 39.56424003                              |
| <b>KIRC</b>   | 0.000403025         | 1.71791E-37         | 3.394667487                              | 36.76499931                              |
| <b>HNSC</b>   | 0.0000127           | 2.56E-42            | 4.896196279                              | 41.59176003                              |
| <b>COAD</b>   | 1.65363E-05         | 6.94781E-44         | 4.781561518                              | 43.15815196                              |
| <b>BRCA</b>   | 1.65363E-05         | 5.72679E-37         | 4.781561518                              | 36.24208896                              |
| <b>BLCA</b>   | 0.0000154           | 6.69E-43            | 4.812479279                              | 42.17457388                              |

**Supplementary Table 7: Summarized clinical information for prostate cancer samples in the TMA**

| Variable                         | African Americans | European Americans | P value  |
|----------------------------------|-------------------|--------------------|----------|
| Age                              | 59.9 $\pm$ 6.7    | 62 $\pm$ 6.3       | 0.22246  |
| Body mass index                  | 27.2 $\pm$ 3.7    | 26.5 $\pm$ 3.7     | 0.34722  |
| Pre-operative PSA                | 6.2 $\pm$ 16.5    | 7.2 $\pm$ 10.8     | 0.34722  |
| Biopsy Gleason score             | 7 $\pm$ 0.9       | 7 $\pm$ 0.6        | 0.6672   |
| Prostatectomy Gleason score      | 7 $\pm$ 0.7       | 7 $\pm$ 0.5        | 0.4777   |
| Lymph nodes                      | 0 lymph nodes: 42 | 0 lymph nodes: 36  | 0.914217 |
|                                  | 1 lymph node: 1   | 1 lymph node: 1    |          |
| Seminal vesicle invasion         | Absent: 37        | Absent: 32         | 0.954565 |
|                                  | Present: 6        | Present: 5         |          |
| Smoking                          | Smokers: 25       | Smokers: 20        | 0.713419 |
|                                  | Non-smokers: 18   | Non-smokers: 17    |          |
| Recurrence*                      | Absent: 28        |                    |          |
|                                  | Present: 15       | Present: 12        |          |
| Prostate cancer associated death | Dead: 1           | Dead: -            |          |
|                                  | Alive: 42         | Alive: 37          |          |

- African Americans (AA): n=53, European Americans (EA): n=51.
- Age, body mass index, PSA, and Gleason scores represented as Median  $\pm$  Standard Deviation.
- \*Data missing for 39 EA patients for recurrence and 51 EA patients for status.
- Data missing for 10 AA and 14 EA patients for all other parameters.
- P values for age, body mass index, PSA, and Gleason scores were calculated using the Wilcoxon rank sum test. A P value < 0.05 was considered significant.
- Data for lymph nodes, seminal vesical invasion, smoking, recurrence and prostate cancer associated death represent number of patients.
- P values for all other frequency variables were calculated using the Chi-Squared test. A P value < 0.05 was considered significant.

**Supplementary Table 8: Summarized clinical information for laryngeal cancer samples in the TMA**

| Variable             | African Americans     | European Americans     | P value  |
|----------------------|-----------------------|------------------------|----------|
| Age                  | 67 $\pm$ 6.1          | 57 $\pm$ 7.4           | 0.0018   |
| Gender               | Male: 10              | Male: 16               | 0.347627 |
|                      | Female: 2             | Female: 1              |          |
| Stage                | Stage 2: 1            | Stage 2: 3             | 0.322379 |
|                      | Stage 3: 2            | Stage 3: 6             |          |
|                      | Stage 4: 9            | Stage 4: 8             |          |
| Lymph nodes          | 0 lymph nodes: 7      | 0 lymph nodes: 12      | 0.350045 |
|                      | 2 lymph nodes: 5      | 2 lymph nodes: 4       |          |
|                      |                       | 3 lymph nodes: 1       |          |
| Smoking*             | Smokers: 11           | Smokers: 16            |          |
|                      |                       | Non-smokers: 1         |          |
| Alcohol consumption* | Drinkers: 8           | Drinkers: 14           | 0.544356 |
|                      | Non-drinkers: 3       | Non-drinkers: 3        |          |
| Radiation*           | Received radiation: 9 | Received radiation: 13 | 0.736268 |
|                      | No radiation: 2       | No radiation: 4        |          |
| Status*              | Dead: 8               | Dead: 12               | 0.90261  |
|                      | Alive: 3              | Alive: 5               |          |

- African Americans (AA): n=12, European Americans (EA): n=17.
- Age represented as Median  $\pm$  Standard Deviation.
- \* Data missing for one AA patient for these parameters.
- Data for gender, stage, lymph node, smoking, alcohol consumption, radiation and status represent number of patients.
- The P value for age was calculated using a two-tailed Wilcoxon rank sum test. A P value <0.05 was considered significant.
- P values for all other frequency variables were calculated using the Chi-Squared test. A P value <0.05 was considered significant.

**Supplementary Table 9: Summarized clinical information for oral cancer samples in the TMA**

| Variable              | African Americans | European Americans | P value   |
|-----------------------|-------------------|--------------------|-----------|
| Age                   | 55.5 ± 11.7       | 63 ± 7.9           | 0.06876   |
| Gender                | Male: 14          | Male: 43           |           |
|                       | Female: -         | Female: -          |           |
| Stage                 | Stage 1: 2        | Stage 1: 9         | 0.95402   |
|                       | Stage 2: 6        | Stage 2: 16        |           |
|                       | Stage 3: 2        | Stage 3: 6         |           |
|                       | Stage 4: 4        | Stage 4: 12        |           |
| Lymph nodes           | 0 lymph nodes: 0  | 0 lymph nodes: 25  | 0.847516  |
|                       | 1 lymph nodes: 2  | 1 lymph nodes: 6   |           |
|                       | 2 lymph nodes: 3  | 2 lymph nodes: 11  |           |
|                       | 3 lymph nodes: -  | 3 lymph nodes: 1   |           |
| Primary Vs. recurrent | Primary: 13       | Primary: 42        | 0.394866  |
|                       | Recurrent: 1      | Recurrent: 1       |           |
| Status                | Dead: 13          | Dead: 31           | 0.1077821 |
|                       | Alive: 1          | Alive: 12          |           |

- African Americans (AA): n=14, European Americans (EA): n=43.
- Age represented as Median ± Standard Deviation.
- The P value for age was calculated using a two-tailed Wilcoxon rank sum test. A P value <0.05 was considered significant.
- Data for gender, stage, lymph node, recurrence and status represent number of patients.
- P values for all other variables were calculated using the Chi-Squared test. A P value <0.05 was considered significant.

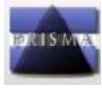

# PRISMA 2009 Checklist

| Section/topic                      | #  | Checklist item                                                                                                                                                                                                                                                                                              | Reported on page # |
|------------------------------------|----|-------------------------------------------------------------------------------------------------------------------------------------------------------------------------------------------------------------------------------------------------------------------------------------------------------------|--------------------|
| <b>TITLE</b>                       |    |                                                                                                                                                                                                                                                                                                             |                    |
| Title                              | 1  | Identify the report as a systematic review, meta-analysis, or both.                                                                                                                                                                                                                                         | 1                  |
| <b>ABSTRACT</b>                    |    |                                                                                                                                                                                                                                                                                                             |                    |
| Structured summary                 | 2  | Provide a structured summary including, as applicable: background; objectives; data sources; study eligibility criteria, participants, and interventions; study appraisal and synthesis methods; results; limitations; conclusions and implications of key findings; systematic review registration number. | 3                  |
| <b>INTRODUCTION</b>                |    |                                                                                                                                                                                                                                                                                                             |                    |
| Rationale                          | 3  | Describe the rationale for the review in the context of what is already known.                                                                                                                                                                                                                              | 4                  |
| Objectives                         | 4  | Provide an explicit statement of questions being addressed with reference to participants, interventions, comparisons, outcomes, and study design (PICOS).                                                                                                                                                  | 4                  |
| <b>METHODS</b>                     |    |                                                                                                                                                                                                                                                                                                             |                    |
| Protocol and registration          | 5  | Indicate if a review protocol exists, if and where it can be accessed (e.g., Web address), and, if available, provide registration information including registration number.                                                                                                                               | NA                 |
| Eligibility criteria               | 6  | Specify study characteristics (e.g., PICOS, length of follow-up) and report characteristics (e.g., years considered, language, publication status) used as criteria for eligibility, giving rationale.                                                                                                      | 8                  |
| Information sources                | 7  | Describe all information sources (e.g., databases with dates of coverage, contact with study authors to identify additional studies) in the search and date last searched.                                                                                                                                  | 8                  |
| Search                             | 8  | Present full electronic search strategy for at least one database, including any limits used, such that it could be repeated.                                                                                                                                                                               | 8                  |
| Study selection                    | 9  | State the process for selecting studies (i.e., screening, eligibility, included in systematic review, and, if applicable, included in the meta-analysis).                                                                                                                                                   | 8                  |
| Data collection process            | 10 | Describe method of data extraction from reports (e.g., piloted forms, independently, in duplicate) and any processes for obtaining and confirming data from investigators.                                                                                                                                  | 8                  |
| Data items                         | 11 | List and define all variables for which data were sought (e.g., PICOS, funding sources) and any assumptions and simplifications made.                                                                                                                                                                       | 8                  |
| Risk of bias in individual studies | 12 | Describe methods used for assessing risk of bias of individual studies (including specification of whether this was done at the study or outcome level), and how this information is to be used in any data synthesis.                                                                                      | 8                  |
| Summary measures                   | 13 | State the principal summary measures (e.g., risk ratio, difference in means).                                                                                                                                                                                                                               | 8                  |
| Synthesis of results               | 14 | Describe the methods of handling data and combining results of studies, if done, including measures of consistency (e.g., $I^2$ ) for each meta-analysis.                                                                                                                                                   | 8                  |





# PRISMA 2009 Checklist

Page 1 of 2

| Section/topic                 | #  | Checklist item                                                                                                                                                                                           | Reported on page # |
|-------------------------------|----|----------------------------------------------------------------------------------------------------------------------------------------------------------------------------------------------------------|--------------------|
| Risk of bias across studies   | 15 | Specify any assessment of risk of bias that may affect the cumulative evidence (e.g., publication bias, selective reporting within studies).                                                             | 8                  |
| Additional analyses           | 16 | Describe methods of additional analyses (e.g., sensitivity or subgroup analyses, meta-regression), if done, indicating which were pre-specified.                                                         | 5                  |
| <b>RESULTS</b>                |    |                                                                                                                                                                                                          |                    |
| Study selection               | 17 | Give numbers of studies screened, assessed for eligibility, and included in the review, with reasons for exclusions at each stage, ideally with a flow diagram.                                          | 5                  |
| Study characteristics         | 18 | For each study, present characteristics for which data were extracted (e.g., study size, PICOS, follow-up period) and provide the citations.                                                             | 5                  |
| Risk of bias within studies   | 19 | Present data on risk of bias of each study and, if available, any outcome level assessment (see item 12).                                                                                                | 5                  |
| Results of individual studies | 20 | For all outcomes considered (benefits or harms), present, for each study: (a) simple summary data for each intervention group (b) effect estimates and confidence intervals, ideally with a forest plot. | 5                  |
| Synthesis of results          | 21 | Present results of each meta-analysis done, including confidence intervals and measures of consistency.                                                                                                  | 5                  |
| Risk of bias across studies   | 22 | Present results of any assessment of risk of bias across studies (see Item 15).                                                                                                                          | 5                  |
| Additional analysis           | 23 | Give results of additional analyses, if done (e.g., sensitivity or subgroup analyses, meta-regression [see Item 16]).                                                                                    | 5                  |
| <b>DISCUSSION</b>             |    |                                                                                                                                                                                                          |                    |
| Summary of evidence           | 24 | Summarize the main findings including the strength of evidence for each main outcome; consider their relevance to key groups (e.g., healthcare providers, users, and policy makers).                     | 7                  |
| Limitations                   | 25 | Discuss limitations at study and outcome level (e.g., risk of bias), and at review-level (e.g., incomplete retrieval of identified research, reporting bias).                                            | 7                  |
| Conclusions                   | 26 | Provide a general interpretation of the results in the context of other evidence, and implications for future research.                                                                                  | 7                  |
| <b>FUNDING</b>                |    |                                                                                                                                                                                                          |                    |
| Funding                       | 27 | Describe sources of funding for the systematic review and other support (e.g., supply of data); role of funders for the systematic review.                                                               | 12                 |

From: Moher D, Liberati A, Tetzlaff J, Altman DG, The PRISMA Group (2009). Preferred Reporting Items for Systematic Reviews and Meta-Analyses: The PRISMA Statement. PLoS Med 6(7): e1000097. doi:10.1371/journal.pmed1000097

For more information, visit: [www.prisma-statement.org](http://www.prisma-statement.org).

Page 2 of 2

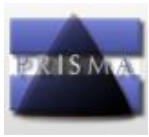

## PRISMA 2009 Flow Diagram

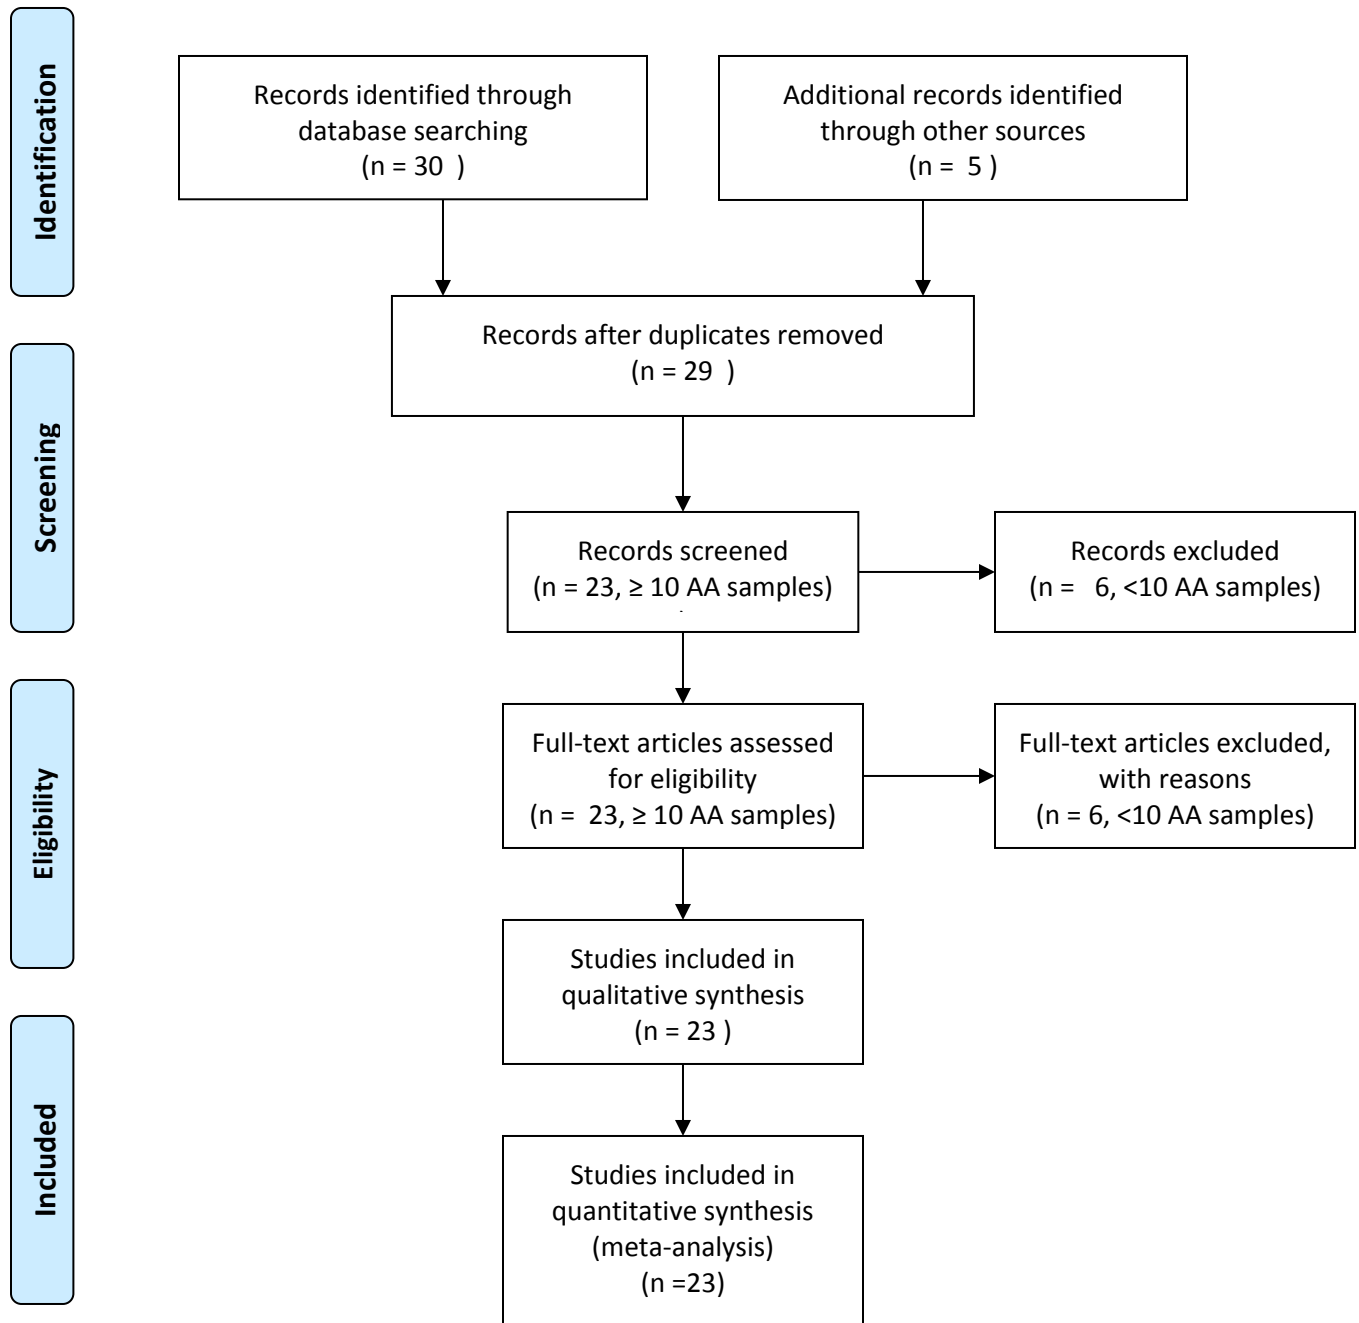

From: Moher D, Liberati A, Tetzlaff J, Altman DG, The PRISMA Group (2009). Preferred Reporting Items for Systematic Reviews and Meta-Analyses: The PRISMA Statement. PLoS Med 6(7): e1000097. doi:10.1371/journal.pmed1000097

For more information, visit [www.prisma-statement.org](http://www.prisma-statement.org).
