# Supplementary material for: ERR1- and PGC1α-associated mitochondrial alterations correlate with pan-cancer disparity in African Americans
Source: JCI journal article supplement (doi:10.1172/jci127579), 2019-03-28
Supplement: sd2 [file 2]

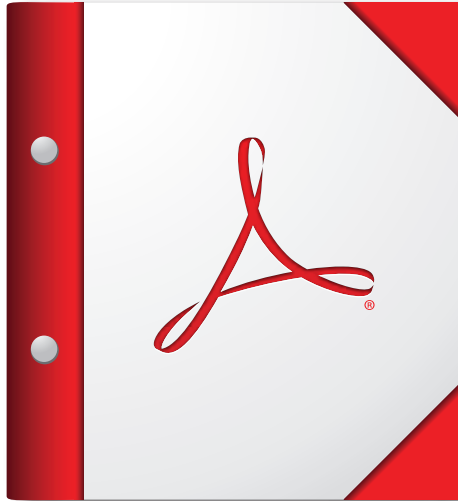

**For the best experience, open this PDF portfolio in  
Acrobat X or Adobe Reader X, or later.**

**[Get Adobe Reader Now!](#)**
